# Supplementary material for: Electronic cigarettes use and ‘dual use’ among the youth in 75 countries: estimates from Global Youth Tobacco Surveys (2014–2019)
Source: PubMed Central journal article supplement (PMC9722706; doi:10.1038/s41598-022-25594-4), 2022-12-05
Supplement: 41598_2022_25594_MOESM1_ESM.pdf [file 41598_2022_25594_MOESM1_ESM.pdf]

**eTable 1**

Survey characteristics, cigarette smoking prevalence, e-cigarette regulatory status, and World Bank classification of the 75 GYTS countries.

| Country                             | Survey year | Response rate* | Current cigarette smoking |             | Sample size  |             | EC regulation | World Bank category |
|-------------------------------------|-------------|----------------|---------------------------|-------------|--------------|-------------|---------------|---------------------|
|                                     |             |                | Prevalence (95% CI)       | m-t-f ratio | Total sample | m-t-f ratio |               |                     |
| <b>AFRICA region (AFR)</b>          |             |                |                           |             |              |             |               |                     |
| Congo                               | 2019        | -              | 4.3 [3.4,5.5]             | 2.2         | 6396         | 1           | NRP           | LM                  |
| Ghana                               | 2017        | 93.8           | 3.0 [2.0,4.5]             | 1.2         | 5664         | 0.9         | NRP           | LM                  |
| Mauritania                          | 2018        | 91.3           | 13.2 [9.1,18.6]           | 1.1         | 3,740        | 0.8         | NRP           | LM                  |
| Mauritius                           | 2016        | 89.4           | 15.2 [11.3,20.0]          | 3.2         | 4,141        | 0.9         | MRP           | UM                  |
| Seychelles                          | 2015        | 79.8           | 15.6 [13.4,18.2]          | 1.8         | 2,485        | 0.9         | MRP           | H                   |
| Togo                                | 2019        | -              | 3.2 [2.4,4.3]             | 7.6         | 3,917        | 1.1         | RP            | L                   |
| <b>REGION OF THE AMERICAS (AMR)</b> |             |                |                           |             |              |             |               |                     |
| Uruguay                             | 2019        | 68.8           | 9.6 [6.5,13.8]            | 0.6         | 2,355        | 1           | MRP           | H                   |
| Antigua & Barbuda                   | 2017        | 87.1           | 2.2 [1.6,3.1]             | 0.7         | 2,268        | 1.1         | MRP           | H                   |
| Argentina                           | 2018        | 61.3           | 19.1 [13.2,26.8]          | 0.8         | 1,453        | 1.3         | MRP           | UM                  |
| Belize                              | 2014        | 83.6           | 8.1 [6.1,10.6]            | 2           | 1,900        | 0.8         | RP            | UM                  |
| Bolivia                             | 2018        | 80.0           | 9.4 [8.0,11.0]            | 1.9         | 5,155        | 1.1         | RP            | LM                  |
| Cuba                                | 2018        | 93.1           | 10.1 [7.0,14.5]           | 1.4         | 4,172        | 1           | NRP           | UM                  |
| Dominican Republic                  | 2016        | 79.5           | 4.5 [3.1,6.4]             | 1.2         | 1,532        | 0.8         | NRP           | UM                  |
| Ecuador                             | 2016        | 83.9           | 9.6 [7.9,11.6]            | 1.6         | 5,462        | 1           | RP            | UM                  |
| El Salvador                         | 2015        | 82.7           | 11.5 [9.8,13.4]           | 1.7         | 3,215        | 0.9         | RP            | LM                  |
| Grenada                             | 2016        | 91.8           | 6.6 [5.1,8.5]             | 1.8         | 2,133        | 1           | RP            | UM                  |
| Guatemala                           | 2015        | 81.3           | 13.5 [11.4,16.0]          | 1.4         | 4,301        | 1.1         | RP            | LM                  |
| Guyana                              | 2015        | 79.6           | 6.7 [4.8,9.4]             | 3.3         | 1,697        | 0.8         | RP            | UM                  |
| Jamaica                             | 2017        | 56.7           | 12.3 [12.3,12.3]          | 1.2         | 1,685        | 0.8         | RP            | UM                  |
| Panama                              | 2017        | 83.6           | 4.2 [3.1,5.7]             | 1.4         | 2,621        | 1           | MRP           | H                   |
| Paraguay                            | 2019        | -              | 2.8 [2.2,3.5]             | 1           | 4,698        | 0.9         | RP            | UM                  |
| Peru                                | 2019        | -              | 6.4 [5.1,8.0]             | 1.7         | 4,148        | 1           | NRP           | UM                  |
| Saint Lucia                         | 2017        | 84.3           | 6.2 [5.0,7.7]             | 1.5         | 1,495        | 0.9         | RP            | UM                  |
| Saint Vincent                       | 2018        | -              | 6.3 [4.7,8.0]             | 1.3         | 1,519        | 0.9         | NRP           | UM                  |
| Suriname                            | 2016        | 86.2           | 10.5 [8.0,13.8]           | 2.4         | 2,212        | 0.9         | MRP           | UM                  |
| Trinidad & Tobago                   | 2017        | 90.7           | 7.5 [5.8,9.7]             | 2           | 4,128        | 0.8         | RP            | H                   |
| Nicaragua                           | 2019        | -              | 12.3 [10.7,14.1]          | 1.8         | 8,735        | 0.9         | MRP           | LM                  |

| <b>EASTERN MEDITERRANEAN REGION (EMR)</b> |      |      |                     |      |       |     |     |    |
|-------------------------------------------|------|------|---------------------|------|-------|-----|-----|----|
| Yemen                                     | 2014 | 85.1 | 6.8 [5.0,9.4]       | 3    | 2,107 | 1.1 | RP  | LM |
| Bahrain                                   | 2015 | 76.9 | 10.8 [7.7,14.9]     | 4    | 3,641 | 1   | NRP | H  |
| Iraq                                      | 2019 | 89.0 | 13.2 [9.3,18.5]     | 3.1  | 2,560 | 2.3 | RP  | UM |
| Kuwait                                    | 2016 | 87.7 | 13.5<br>[10.6,17.1] | 3.9  | 2,477 | 0.8 | MRP | H  |
| Morocco                                   | 2016 | 86.0 | 2.6 [1.8,3.7]       | 4    | 3,915 | 1   | NRP | LM |
| Oman                                      | 2016 | 91.9 | 2.6 [1.6,4.2]       | 4.9  | 2,208 | 0.9 | MRP | H  |
| Qatar                                     | 2018 | 89.0 | 6.7 [4.7,9.4]       | 4.1  | 2,071 | 1   | MRP | H  |
| Tunisia                                   | 2017 | 92.8 | 7.9 [6.4,9.7]       | 11.2 | 2,448 | 0.8 | RP  | LM |
| <b>SOUTH-EAST ASIAN REGION (SEAR)</b>     |      |      |                     |      |       |     |     |    |
| Thailand                                  | 2015 | 86.1 | 10.9 [8.2,14.4]     | 3.5  | 1,876 | 0.8 | MRP | UM |
| Indonesia                                 | 2019 | 91.0 | 19.6<br>[17.8,21.6] | 17.8 | 9,992 | 0.8 | RP  | UM |
| Maldives                                  | 2019 | 70.0 | 5.3 [4.3,6.5]       | 3.4  | 4,799 | 0.8 | RP  | UM |
| <b>WESTERN PACIFIC REGION (WPR)</b>       |      |      |                     |      |       |     |     |    |
| Vanuatu                                   | 2017 | 64.5 | 21.2<br>[17.4,25.7] | 1.9  | 2,257 | 0.7 | NRP | LM |
| Cambodia                                  | 2016 | 81.0 | 0.9 [0.5,1.7]       | 5    | 3,716 | 0.8 | MRP | LM |
| Cook Islands                              | 2016 | 56.6 | 19.1<br>[19.1,19.1] | 1.6  | 614   | 0.9 | NRP | H  |
| Fiji                                      | 2016 | 80.7 | 12.1 [9.2,15.7]     | 2.1  | 3,697 | 0.8 | RP  | UM |
| Guam                                      | 2017 | 70.7 | 11 [9.5,12.7]       | 1.6  | 2,506 | 1   | RP  | H  |
| Kiribati                                  | 2018 | 71.2 | 24.1<br>[21.1,27.3] | 2.3  | 2,622 | 0.8 | NRP | LM |
| Lao republic                              | 2016 | 98.0 | 7.9 [6.5,9.6]       | 6.7  | 6,550 | 1   | MRP | LM |
| Macao                                     | 2015 | 76.6 | 4.8 [2.7,8.4]       | 1.8  | 1,907 | 1   | MRP | H  |
| Marshall Islands                          | 2016 | 83.8 | 22 [19.5,24.8]      | 3.2  | 3,522 | 0.8 | NRP | UM |
| Mongolia                                  | 2019 | 92.1 | 4.7 [3.6,6.0]       | 8.3  | 4,146 | 0.9 | NRP | LM |
| Niue                                      | 2019 | 77.3 | 11.8 [6.9,19.4]     | 2.3  | 163   | 0.9 | RP  | H  |
| Papua New Guinea                          | 2016 | 60.0 | 26.2<br>[22.9,29.8] | 1.9  | 2,301 | 1   | RP  | LM |
| Philippines                               | 2015 | 82.7 | 14.7<br>[12.9,16.7] | 2.9  | 8,789 | 0.8 | LRP | LM |
| Samoa                                     | 2017 | 61.9 | 12.6 [9.9,15.9]     | 4.2  | 2,076 | 0.6 | NRP | UM |
| <b>EUROPEAN REGION (EUR)</b>              |      |      |                     |      |       |     |     |    |
| Ukraine                                   | 2017 | 81.6 | 7.7 [5.8,10.1]      | 1.3  | 4,065 | 1   | RP  | LM |
| Albania                                   | 2015 | 89.3 | 8.4 [6.2,11.3]      | 2.7  | 4,672 | 0.9 | LRP | UM |
| Belarus                                   | 2015 | 81.3 | 7.8 [6.3,9.5]       | 1    | 2,993 | 1   | NRP | UM |
| Bosnia & Herzegovina                      | 2019 | -    | 17.4<br>[14.4,20.4] | 1.4  | 5,483 | 1.1 | NRP | UM |
| Bulgaria                                  | 2015 | 86.0 | 22.8<br>[18.8,27.3] | 0.8  | 4,042 | 0.9 | LRP | UM |

|                     |      |      |                     |     |       |     |     |    |
|---------------------|------|------|---------------------|-----|-------|-----|-----|----|
| Croatia             | 2016 | 95.8 | 16.7<br>[12.9,21.3] | 1.1 | 3,250 | 1.1 | LRP | UM |
| Czech Republic      | 2016 | 78.3 | 15.2<br>[12.9,17.9] | 0.9 | 3,926 | 1   | LRP | H  |
| Georgia             | 2017 | 78.7 | 8.3 [6.0,11.4]      | 3.1 | 1,345 | 1   | RP  | LM |
| Italy               | 2018 | -    | 21 [17.9,24.4]      | 0.7 | 1,680 | 1   | LRP | H  |
| Kazakhstan          | 2014 | 96.2 | 1.8 [1.1,3.0]       | 1.5 | 2,083 | 1.1 | NRP | UM |
| Kosovo              | 2016 | 94.6 | 3.8 [2.9,4.9]       | 3.1 | 5,031 | 1   | NRP | LM |
| Kyrgyzstan          | 2019 | 88.8 | 2.7 [1.8,4.0]       | 5   | 6,145 | 1   | NRP | LM |
| Latvia              | 2019 | -    | 15.7<br>[13.2,18.7] | 1   | 4,226 | 1.1 | LRP | H  |
| Macedonia           | 2016 | 92   | 8.1 [6.5,10.1]      | 1.5 | 5,141 | 1   | NRP | UM |
| Montenegro          | 2018 | 92.6 | 6.2 [5.1,7.5]       | 1.2 | 4,216 | 1   | RP  | UM |
| Poland              | 2016 | 81.7 | 20.5<br>[18.6,22.6] | 1.1 | 5,154 | 0.9 | RP  | H  |
| Republic of Moldova | 2019 | 93.3 | 7.8 [6.4,9.4]       | 2.6 | 4,717 | 1   | RP  | LM |
| Romania             | 2017 | -    | 7.7 [6.5,9.1]       | 1.4 | 5,409 | 0.9 | RP  | UM |
| San Marino          | 2018 | 92   | 8.3 [5.6,12.2]      | 1.1 | 624   | 1.2 | NRP | H  |
| Serbia              | 2017 | -    | 13.7<br>[13.7,13.7] | 1   | 3,861 | 1   | RP  | UM |
| Slovakia            | 2016 | 81.7 | 17.3<br>[15.0,19.9] | 0.9 | 3,997 | 1   | LRP | H  |
| Slovenia            | 2017 | 68.0 | 9.5 [6.8,13.2]      | 0.8 | 2,629 | 0.9 | LRP | H  |
| Srpska              | 2018 | -    | 12 [9.8,14.8]       | 1.3 | 5,346 | 0.9 | NRP | UM |

\* data on response rate was obtained from the country reports (-indicates unavailability of the country report)
