# Supplementary material for: Electronic cigarettes use and ‘dual use’ among the youth in 75 countries: estimates from Global Youth Tobacco Surveys (2014–2019)
Source: PubMed Central journal article supplement (PMC9722706; doi:10.1038/s41598-022-25594-4), 2022-12-05
Supplement: 41598_2022_25594_MOESM2_ESM.pdf [file 41598_2022_25594_MOESM2_ESM.pdf]

e-Table, Sex-wise prevalence estimates of awareness, e-cigarette use, and dual-use in 75 countries

| Country             | Boys      |             |          |             |             |             |          |             | Girls     |             |          |             |             |             |          |             |
|---------------------|-----------|-------------|----------|-------------|-------------|-------------|----------|-------------|-----------|-------------|----------|-------------|-------------|-------------|----------|-------------|
|                     | awareness |             | Ever use |             | Current use |             | Dual-use |             | Awareness |             | Ever use |             | Current use |             | Dual-use |             |
| Seychelles          | 44        | [40.4,47.7] | 15.6     | [13.2,18.3] | 10.2        | [8.1,12.8]  | 4.2      | [2.9,6.0]   | 32.2      | [28.5,36.1] | 8.1      | [6.1,10.6]  | 4.6         | [3.4,6.2]   | 1.4      | [0.8,2.3]   |
| Uruguay             |           |             | 26.9     | [18.8,34.9] | 18          | [10.7,28.7] | 4.4      | [1.1,15.8]  |           |             |          |             | 9.7         | [7.9,11.9]  | 2.7      | [1.9,3.9]   |
| Antigua and Barbuda | 48.9      | [44.6,53.1] |          |             | 5.2         | [4.0,6.8]   | 0.6      | [0.3,1.3]   | 50.3      | [45.6,55.1] |          |             | 4.3         | [3.1,6.1]   | 0.8      | [0.4,1.6]   |
| Panama              | 48.2      | [42.7,53.7] | 7.9      | [6.2,10.0]  | 8           | [6.2,10.2]  | 1.5      | [0.9,2.7]   | 42.1      | [36.5,47.9] | 7.1      | [5.6,9.0]   | 5.3         | [3.9,7.2]   | 0.9      | [0.5,1.6]   |
| Trinidad and Tobago | 72.3      | [68.8,75.5] | 31.8     | [28.8,34.9] | 19.8        | [17.2,22.6] | 5.1      | [3.7,7.1]   | 71.6      | [68.9,74.2] | 22.4     | [19.3,25.9] | 12          | [10.0,14.4] | 2.3      | [1.6,3.3]   |
| Bahrain             | 68.2      | [63.5,72.5] | 29       | [24.1,34.6] |             |             | 0        |             | 53        | [47.8,58.0] | 11.4     | [9.9,13.0]  |             |             | 0        |             |
| Kuwait              | 85.7      | [81.1,89.3] | 33.2     | [28.4,38.4] |             |             | 0        |             | 77.5      | [71.8,82.3] | 14.9     | [12.4,17.8] |             |             | 0        |             |
| Oman                | 49.1      | [43.9,54.3] |          |             | 9.7         | [7.2,13.0]  | 1.4      | [0.9,2.0]   | 39.6      | [31.1,48.8] |          |             | 2.5         | [1.5,4.3]   | 0.2      | [0.1,0.8]   |
| Qatar               | 66.1      | [61.4,70.4] | 23       | [18.8,27.9] | 14.8        | [11.8,18.2] | 3.4      | [2.2,5.2]   | 56.2      | [51.2,61.1] | 12       | [9.6,14.9]  | 7.2         | [5.3,9.7]   | 0.8      | [0.4,1.6]   |
| Cook Islands        | 45.1      | [45.1,45.1] | 16.5     | [16.5,16.5] | 10.2        | [10.2,10.2] | 5        | [5.0,5.0]   | 45.4      | [45.4,45.4] | 15.4     | [15.4,15.4] | 8.3         | [8.3,8.3]   | 3.1      | [3.1,3.1]   |
| Guam                | 83.4      | [80.5,85.9] | 51.1     | [47.0,55.2] | 38.7        | [35.2,42.3] | 9.4      | [7.6,11.5]  | 81.9      | [79.1,84.4] | 44.2     | [40.2,48.3] | 30.4        | [27.3,33.7] | 5.3      | [4.0,7.0]   |
| Macau               | 70.9      | [66.6,74.9] |          |             | 4           | [2.4,6.6]   | 1.1      | [0.4,2.7]   | 70.7      | [66.5,74.6] |          |             | 1.3         | [0.7,2.6]   | 0.6      | [0.3,1.1]   |
| Niue                | 79.9      | [69.3,87.5] | 46       | [34.1,58.5] | 29.8        | [20.4,41.3] | 12.9     | [6.5,24.0]  | 65.3      | [54.2,75.0] | 27.7     | [17.5,40.9] | 16.7        | [9.2,28.5]  | 3.8      | [1.3,10.1]  |
| Czech Republic      | 95.5      | [94.3,96.4] | 27.3     | [23.7,31.2] | 12.4        | [10.1,15.3] | 7.9      | [6.0,10.2]  | 95.1      | [93.8,96.2] | 25       | [21.7,28.7] | 9.7         | [8.0,11.8]  | 6.7      | [5.1,8.7]   |
| Italy               |           |             | 47.2     | [42.1,52.2] |             | [18.8,26.7] | 11.5     | [8.9,14.7]  |           |             | 42.5     | [38.0,47.0] |             | [11.3,16.3] | 8.3      | [6.6,10.4]  |
| Latvia              |           |             | 58.7     | [55.2,62.1] |             | [20.5,25.7] | 10       | [8.3,11.9]  |           |             | 45.8     | [41.4,50.2] | 13.9        | [11.6,16.5] | 7.2      | [5.7,9.1]   |
| Poland              | 94.9      | [93.2,96.3] | 48       | [45.2,50.7] | 31.5        | [28.8,34.4] | 15.3     | [13.4,17.3] | 96.8      | [95.9,97.5] | 40.6     | [37.4,43.9] | 21.8        | [19.0,24.9] | 11.8     | [10.0,13.9] |
| San Marino          | 33        | [25.7,41.2] | 27.9     | [22.3,34.3] | 12.2        | [8.5,17.3]  | 5.4      | [3.4,8.4]   | 24.3      | [18.2,31.5] | 19.3     | [13.7,26.6] | 8.8         | [5.6,13.6]  | 2.6      | [0.9,7.3]   |
| Slovakia            |           |             |          |             | 9.7         | [7.7,12.2]  | 5.6      | [4.2,7.5]   |           |             |          |             | 6.2         | [4.7,8.0]   | 4.1      | [3.0,5.6]   |
| Slovenia            | 86.4      | [83.0,89.2] | 20.9     | [16.7,25.9] |             |             | 0        |             | 83.3      | [80.0,86.1] | 12.1     | [9.9,14.8]  |             |             | 0        |             |

|                     |      |             |      |             |      |             |     |            |      |             |      |             |      |             |     |            |
|---------------------|------|-------------|------|-------------|------|-------------|-----|------------|------|-------------|------|-------------|------|-------------|-----|------------|
| Togo                | 16.4 | [11.9,22.1] |      |             | 1.4  | [0.9,2.0]   | 0.5 | [0.2,1.0]  | 15.9 | [10.0,24.4] | 23.7 | [20.2,27.2] | 1    | [0.5,1.9]   | 0.2 | [0.1,0.5]  |
| Congo               | 39.5 | [34.7,44.4] | 8.9  | [7.3,10.7]  | 4.6  | [3.7,5.6]   | 1.3 | [0.9,1.9]  | 34.1 | [29.6,38.9] | 7.1  | [5.2,9.5]   | 4    | [2.8,5.6]   | 0.7 | [0.4,1.2]  |
| Ghana               | 14.2 | [11.3,17.7] | 8.2  | [5.5,12.1]  | 5.5  | [3.6,8.4]   | 0.8 | [0.4,1.4]  | 13.9 | [11.0,17.4] | 8.7  | [5.9,12.8]  | 6.1  | [3.8,9.6]   | 1.6 | [0.8,3.3]  |
| Mauritania          | 36.4 | [31.8,41.3] |      |             | 17.5 | [13.8,21.9] | 5.3 | [3.4,8.3]  | 29.9 | [25.4,34.9] |      |             | 19   | [12.7,27.5] | 7.6 | [4.2,13.2] |
| Bolivia             | 52.2 | [47.8,56.6] | 16   | [14.0,18.2] | 10.8 | [9.2,12.6]  | 3.9 | [3.0,5.0]  | 44.9 | [40.1,49.9] | 9.2  | [6.8,12.4]  | 5.7  | [4.4,7.2]   | 2.2 | [1.4,3.3]  |
| El Salvador         | 37.3 | [32.3,42.5] | 10.3 | [7.6, 13.1] | 3.6  | [2.8,4.6]   | 1.7 | [1.2,2.4]  | 25.5 | [22.1,29.2] | 5.3  | [3.7, 6.9]  | 2.5  | [1.7,3.6]   | 1.4 | [0.8,2.4]  |
| Guatemala           | 42.6 | [36.1,49.3] | 11.7 | [9.3,14.6]  | 6.5  | [4.8,8.7]   | 3.8 | [2.6,5.5]  | 36.9 | [31.8,42.3] | 11   | [9.1,13.2]  | 5.3  | [4.1,6.7]   | 2.3 | [1.7,3.1]  |
| Yemen               | 34.7 | [27.8,42.3] | 18.5 | [16.2,21.0] | 17.6 | [15.7,19.7] | 3.2 | [2.1,4.7]  | 22   | [16.2,29.3] | 7.6  | [4.7,11.9]  | 8.2  | [6.0,11.1]  | 0.7 | [0.3,1.6]  |
| Morocco             | 48.8 | [41.0,56.7] |      |             | 6.9  | [5.1,9.2]   | 1.2 | [0.7,2.1]  | 40.2 | [34.6,46.0] |      |             | 3.8  | [2.4,5.8]   | 0.3 | [0.1,0.9]  |
| Tunisia             | 60.7 | [55.9,65.2] | 9.6  | [7.9,11.8]  | 7.5  | [6.0,9.5]   | 3.1 | [1.9,4.9]  | 48.5 | [43.7,53.4] | 3    | [2.2,4.2]   | 2.1  | [1.4,3.1]   | 0.1 | [0.0,0.6]  |
| Vanuatu             | 21.6 | [17.9,25.7] | 14.5 | [11.4,18.2] | 10.1 | [7.4,13.6]  | 7.5 | [5.2,10.7] | 20.6 | [17.4,24.3] | 6.8  | [4.8,9.4]   | 4.1  | [2.7,6.0]   | 1.9 | [1.1,3.1]  |
| Cambodia            | 11.7 | [8.8,15.5]  | 2.7  | [2.0,3.6]   | 2.6  | [2.0,3.4]   | 0.1 | [0.0,0.3]  | 7.1  | [5.6,9.1]   | 1.9  | [1.2,2.9]   | 2.1  | [1.5,3.0]   | 0.1 | [0.0,0.3]  |
| Kiribati            | 29.7 | [26.5,33.1] | 15.5 | [12.2,18.8] | 15.7 | [13.1,18.6] | 7.6 | [6.0,9.5]  | 22   | [19.5,24.8] | 8.5  | [6.9, 10.2] | 7.1  | [5.2,9.7]   | 2.6 | [1.5,4.5]  |
| Lao Republic        | 18.1 | [15.2,21.5] | 89.5 | [87.2,91.4] | 5.9  | [4.4,7.9]   | 2.3 | [1.6,3.1]  | 15   | [12.3,18.3] | 93.5 | [92.1,94.6] | 3.6  | [2.7,4.9]   | 0.4 | [0.2,0.8]  |
| Mongolia            | 56.7 | [50.9,62.3] | 14.6 | [11.8,18.0] | 5.7  | [4.2,7.7]   | 1.8 | [1.2,2.8]  | 48.2 | [43.3,53.1] | 5.1  | [3.7,6.9]   | 1    | [0.5,2.0]   | 0.2 | [0.0,0.8]  |
| Papua New Guinea    | 21.6 | [18.0,25.6] |      |             | 19.7 | [16.1,23.8] | 9.1 | [6.8,11.9] | 18   | [15.5,20.8] |      |             | 15.3 | [12.1,19.1] | 5.6 | [3.6,8.7]  |
| Philippines         | 49.7 | [43.7,55.7] | 16.8 | [14.3,19.5] |      |             | 0   |            | 37.2 | [33.4,41.1] | 7.6  | [5.6,10.1]  |      |             | 0   |            |
| Ukraine             | 94.2 | [91.4,96.1] | 42.7 | [38.5,47.1] | 21.7 | [18.1,25.9] | 4.1 | [2.7,6.1]  | 92.2 | [90.0,94.0] | 29.5 | [25.8,33.4] | 12.8 | [10.4,15.7] | 3.3 | [2.3,4.7]  |
| Georgia             | 81.5 | [76.4,85.7] |      |             |      | [12.9,23.3] | 6.1 | [4.1,8.8]  | 76.3 | [66.8,83.8] |      |             | 6.4  | [4.6,8.9]   | 0.6 | [0.2,1.9]  |
| Kosovo              | 42   | [38.5,45.5] | 10.6 | [9.4,11.9]  | 6.2  | [5.0,7.6]   | 1.6 | [1.1,2.4]  | 31.6 | [27.4,36.0] | 4.2  | [3.3,5.2]   | 2.7  | [2.0,3.6]   | 0.5 | [0.3,0.9]  |
| Kyrgyzstan          | 47.9 | [42.9,52.9] | 7.7  | [6.0, 9.4]  | 4.1  | [3.0,5.5]   | 0.9 | [0.6,1.5]  | 33.9 | [29.1,39.1] | 2.9  | [1.9, 4.0]  | 1.6  | [1.0,2.5]   | 0.1 | [0.1,0.3]  |
| Republic of Moldova | 86.5 | [83.6,89.0] | 40.2 | [35.7,45.0] | 17.1 | [14.9,19.6] | 5.1 | [3.8,6.7]  | 89   | [86.8,90.9] | 23.8 | [21.5,26.1] | 8.4  | [6.8,10.4]  | 1.7 | [1.2,2.5]  |
| Nicaragua           |      |             | 16.7 | [14.0,19.3] | 10   | [8.6,11.5]  | 4.1 | [3.3,5.0]  |      |             | 12.1 | [9.6, 14.7] | 7    | [6.1,8.1]   | 2.1 | [1.7,2.6]  |
| Mauritius           | 69.1 | [63.2,74.5] |      |             | 18.3 | [15.1,21.9] | 10  | [7.6,13.1] | 39.9 | [34.1,46.0] |      |             | 4.6  | [3.0,7.2]   | 1.6 | [0.9,2.7]  |

|                    |      |             |      |             |      |             |      |             |      |             |      |             |      |             |     |           |
|--------------------|------|-------------|------|-------------|------|-------------|------|-------------|------|-------------|------|-------------|------|-------------|-----|-----------|
| Argentina          | 76.7 | [69.0,83.0] | 16.7 | [11.3,23.9] | 9.4  | [6.0,14.4]  | 4.4  | [2.8,6.9]   | 75.4 | [65.7,83.1] | 14.7 | [10.4,20.2] | 7    | [4.8,9.9]   | 3.8 | [2.4,5.8] |
| Belize             | 38.6 | [32.9,44.7] | 9.4  | [6.9,12.7]  | 8.6  | [6.6,11.2]  | 3.7  | [2.4,5.5]   | 28.9 | [24.1,34.2] | 6.1  | [4.5,8.4]   | 4    | [3.0,5.5]   | 0.9 | [0.5,1.7] |
| Cuba               | 52.6 | [46.8,58.4] |      |             | 7.1  | [5.2,9.7]   | 3.3  | [2.2,4.9]   | 46.6 | [40.7,52.6] |      |             | 4.6  | [3.2,6.5]   | 1.7 | [0.8,3.4] |
| Dominican Republic | 72.7 | [66.6,78.1] | 26.2 | [21.3,31.8] | 12.7 | [10.0,16.1] | 2.2  | [1.1,4.3]   | 62.2 | [55.5,68.4] | 14.6 | [11.0,19.1] | 8    | [5.7,11.0]  | 0.8 | [0.3,2.3] |
| Ecuador            | 54.7 | [45.5,63.5] | 20.9 | [13.9,30.2] | 12.9 | [9.7,17.0]  | 4.2  | [2.8,6.3]   | 46.2 | [38.2,54.4] | 13.9 | [9.5,19.8]  | 8.6  | [7.0,10.5]  | 3   | [2.1,4.2] |
| Grenada            | 47.9 | [41.2,54.6] |      |             | 9.6  | [7.4,12.3]  | 2.5  | [1.6,3.9]   | 41.8 | [36.7,47.1] |      |             | 5.6  | [4.0,7.6]   | 1.6 | [1.0,2.5] |
| Guyana             | 26.3 | [23.1,29.9] | 9.6  | [6.5,13.9]  | 8.8  | [5.4,13.8]  | 3.1  | [1.8,5.3]   | 18.8 | [15.1,23.3] | 5.5  | [3.7,8.0]   | 6.7  | [5.0,9.0]   | 1.5 | [0.8,2.9] |
| Jamaica            | 46.2 | [46.2,46.2] | 19.3 | [19.3,19.3] | 15.2 | [15.2,15.2] | 5.3  | [5.3,5.3]   | 42.2 | [42.2,42.2] | 13   | [13.0,13.0] | 9.7  | [9.7,9.7]   | 2.4 | [2.4,2.4] |
| Paraguay           | 78.3 | [67.4,86.3] | 26.0 | [19.7,32.3] | 12.8 | [10.3,15.7] | 1.4  | [1.0,2.1]   | 76.7 | [64.9,85.5] | 20.7 | [16.6,24.8] | 9.9  | [8.1,12.0]  | 1.8 | [1.2,2.7] |
| Peru               | 54.7 | [48.3,60.9] | 14.6 | [11.8,17.5] | 8.3  | [6.7,10.2]  | 2.9  | [2.0,4.1]   | 50.7 | [44.7,56.6] | 12.0 | [9.8,14.2]  | 5.3  | [4.3,6.6]   | 1.6 | [1.2,2.1] |
| Saint Lucia        | 52.5 | [46.5,58.5] | 19.6 | [16.3,23.3] | 14.4 | [11.3,18.2] | 3.7  | [2.3,5.7]   | 42.3 | [36.2,48.6] | 11.6 | [9.2,14.5]  | 6.6  | [4.5,9.5]   | 2.1 | [1.2,3.6] |
| Suriname           | 45.6 | [40.1,51.1] |      |             | 7.7  | [5.7,10.4]  | 3.5  | [2.5,4.9]   | 37.3 | [32.0,42.9] |      |             | 3.7  | [2.7,5.2]   | 0.7 | [0.4,1.4] |
| Iraq               | 58.6 | [51.6,65.3] | 20.3 | [16.4,24.8] | 12.8 | [9.4,17.1]  | 6.5  | [3.9,10.4]  | 47.5 | [39.1,56.0] | 9.8  | [6.7,14.3]  | 4    | [2.2,7.4]   | 1.6 | [0.7,3.4] |
| Thailand           | 43   | [35.4,50.9] | 7.6  | [5.4,10.7]  | 4.8  | [3.6,6.5]   | 2.8  | [2.1,3.6]   | 33.8 | [28.1,40.1] | 3    | [1.9,4.7]   | 1.9  | [1.0,3.5]   | 0.8 | [0.3,2.1] |
| Indonesia          | 79.7 | [77.2,82.1] | 40.6 | [36.7,44.6] | 25.4 | [22.7,28.2] | 16.9 | [15.0,19.1] | 63.2 | [59.2,67.0] | 6    | [5.0,7.0]   | 3.8  | [3.2,4.6]   | 0.6 | [0.4,0.9] |
| Maldives           | 64.2 | [60.7,67.7] | 26.3 | [22.9,29.9] |      |             | 0    |             | 53.7 | [50.1,57.2] | 11.2 | [9.5,13.3]  |      |             | 0   |           |
| Fiji               | 39.4 | [35.7,43.3] | 17.7 | [13.3,23.1] | 16.3 | [12.3,21.3] | 4.9  | [3.4,7.0]   | 29   | [26.2,32.0] | 7.2  | [5.4,9.5]   | 9    | [7.3,11.1]  | 1.5 | [1.0,2.4] |
| Marshall Islands   | 30.5 | [27.4,33.8] |      |             | 24.9 | [21.8,28.3] | 13.1 | [10.8,15.8] | 26.1 | [23.5,28.9] |      |             | 13.1 | [11.0,15.5] | 3.9 | [3.0,5.0] |
| Samoa              | 34.6 | [29.8,39.8] | 18.8 | [15.6,22.5] | 19.1 | [16.0,22.8] | 7.3  | [5.6,9.4]   | 20.5 | [16.9,24.7] | 5.5  | [4.1,7.5]   | 6.1  | [4.5,8.1]   | 1.1 | [0.5,2.5] |
| Albania            | 68.9 | [64.0,73.4] |      |             | 9.9  | [8.4,11.7]  | 3.9  | [2.7,5.6]   | 59.4 | [55.2,63.5] |      |             | 3.2  | [2.4,4.3]   | 0.8 | [0.4,1.5] |
| Belarus            | 80.5 | [76.4,84.0] |      |             |      |             | 0    |             | 83.3 | [79.2,86.7] |      |             |      |             | 0   |           |
| Bulgaria           | 87.4 | [83.0,90.8] | 22.5 | [19.2,26.1] | 12.6 | [9.6,16.2]  | 5.9  | [3.6,9.6]   | 89.7 | [86.0,92.5] | 20.6 | [18.1,23.4] | 8.9  | [7.0,11.4]  | 5.6 | [4.1,7.7] |
| Croatia            | 90.2 | [87.5,92.4] | 26.9 | [20.7,34.3] | 14.7 | [11.2,19.1] | 7.5  | [4.8,11.4]  | 92   | [89.1,94.2] | 17.3 | [13.8,21.5] | 6.8  | [5.1,9.1]   | 4.4 | [3.0,6.5] |
| Kazakhstan         | 49.2 | [40.0,58.5] | 4.6  | [2.6,7.9]   | 2.4  | [1.3,4.2]   | 0.3  | [0.1,0.8]   | 41.7 | [30.1,54.3] | 2    | [1.1,3.6]   | 1.4  | [0.8,2.4]   | 0.5 | [0.2,1.3] |

|               |      |             |      |             |     |              |     |            |      |             |      |             |     |            |     |            |
|---------------|------|-------------|------|-------------|-----|--------------|-----|------------|------|-------------|------|-------------|-----|------------|-----|------------|
| Macedonia     | 72   | [68.7,75.1] |      |             | 6   | [4.7,7.5]    | 2.3 | [1.6,3.3]  | 65.1 | [61.5,68.5] |      |             | 2.1 | [1.6,2.8]  | 1   | [0.6,1.5]  |
| Montenegro    | 81.3 | [78.5,83.9] |      |             |     |              | 0   |            | 82   | [79.0,84.6] |      |             |     |            | 0   |            |
| Romania       | 22.7 | [20.4,25.1] | 16.8 | [15.0,18.8] | 9.6 | [8.1,11.4]   | 3.5 | [2.7,4.6]  | 16.5 | [14.2,19.0] | 11.5 | [9.9,13.4]  | 5.5 | [4.4,6.8]  | 2.3 | [1.7,3.0]  |
| Serbia        |      |             | 25.4 | [23.5,27.4] | 8.4 | [8.4,8.4]    | 4.1 | [4.1,4.1]  |      |             | 21.1 | [19.2,22.9] | 5.4 | [5.4,5.4]  | 2.7 | [2.7,2.7]  |
| Srpska        | 83.2 | [79.8,86.2] |      |             |     |              | 0   |            | 90   | [88.2,91.5] |      |             |     |            | 0   |            |
| Saint Vincent |      |             |      |             | 7.9 | [5.9, 9.9]   | 1.4 | [0.4, 2.3] |      |             |      |             | 7.1 | [4.5, 9.4] | 2.4 | [1.1, 3.7] |
| Bosnia        |      |             |      |             | 17  | [16.9, 19.1] | 7.7 | [6.2, 9.3] |      |             |      |             | 6.5 | [5.1, 7.9] | 3.6 | [2.4, 4.9] |
